# Supplementary material for: The Risk of Venous Thromboembolism in Korean Patients with Breast Cancer: A Single-Center Experience
Source: MDPI journal article supplement (doi:10.3390/cancers15123124), 2023-06-09
Supplement: s1 [file s1]

Supplementary Figure S1. Comparison between patients with asymptomatic VTE and symptomatic VTE. There were no significant differences in disease-free survival ( $p=0.558$ ) and overall survival ( $p=0.328$ ).

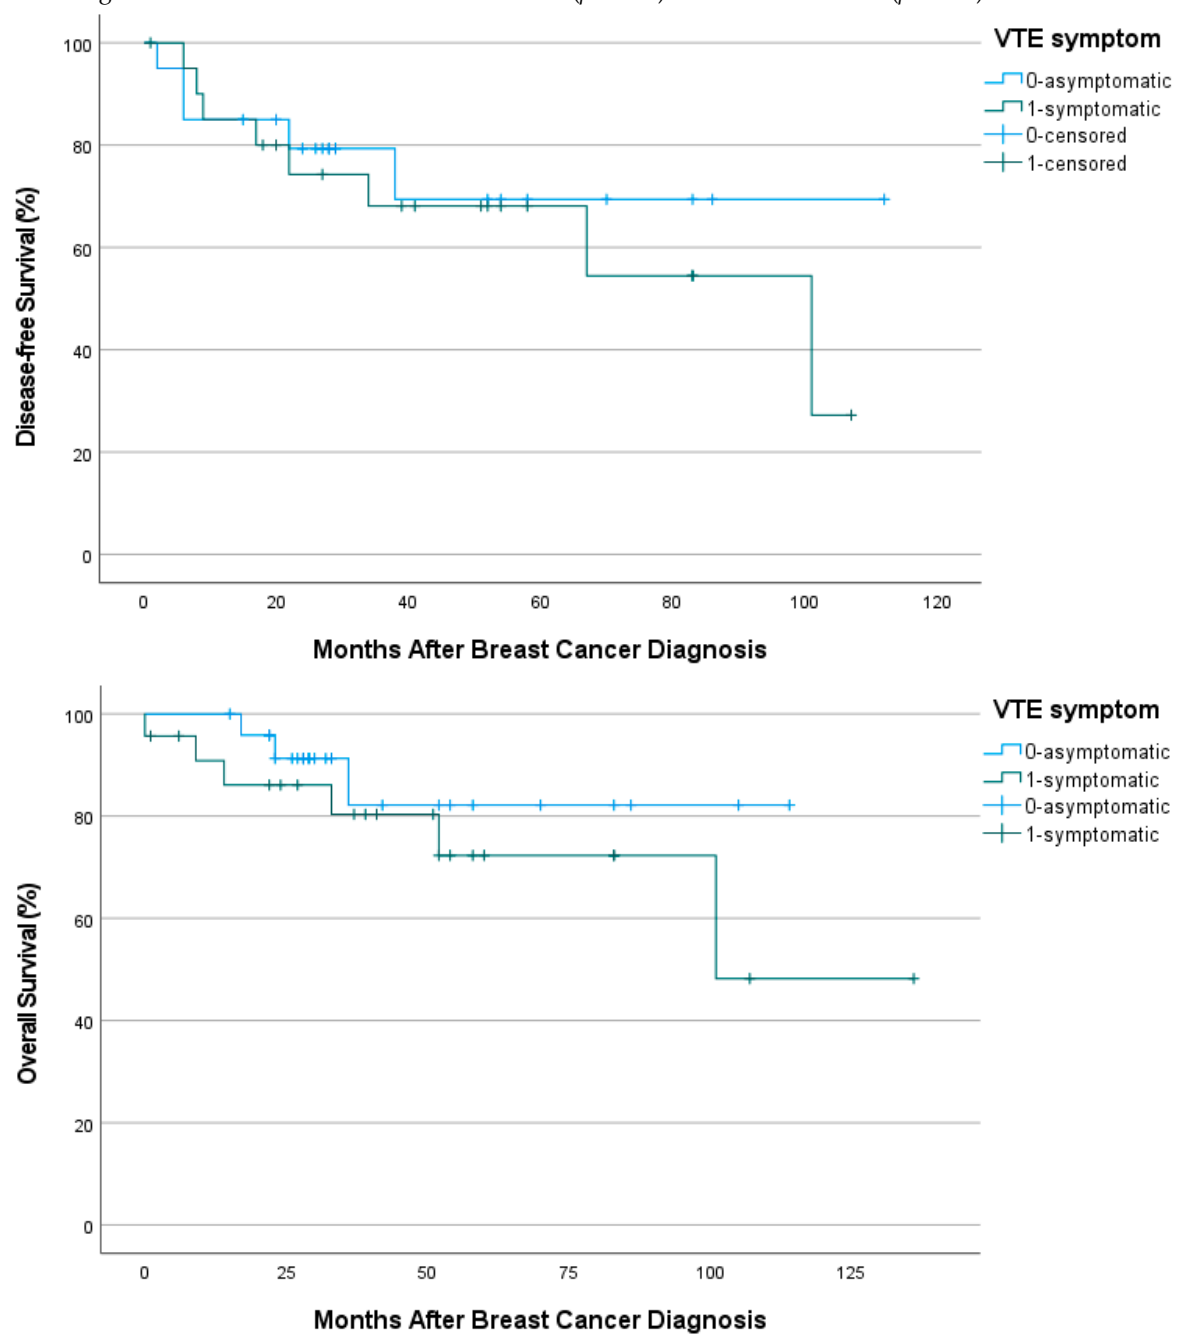

Supplementary Table S1. The association between comorbidities and VTE

|                                             | Patients without VTE (n=2198) | Patients with VTE (n=48) | <i>p</i> |
|---------------------------------------------|-------------------------------|--------------------------|----------|
| Hypertension                                |                               |                          | <0.001   |
| Absent                                      | 1675 (76.2%)                  | 25 (52.1%)               |          |
| Present                                     | 523 (23.8%)                   | 23 (47.9%)               |          |
| Diabetes mellitus                           |                               |                          | 0.020    |
| Absent                                      | 1995 (90.8%)                  | 38 (79.2%)               |          |
| Present                                     | 203 (9.2%)                    | 10 (20.8%)               |          |
| Malignancy other than breast cancer         |                               |                          | 0.289    |
| Absent                                      | 2094 (95.3%)                  | 44 (91.7%)               |          |
| Present                                     | 104 (4.7%)                    | 4 (8.3%)                 |          |
| Psychiatric disorder                        |                               |                          | 0.155    |
| Absent                                      | 2137 (97.2%)                  | 45 (93.8%)               |          |
| Present                                     | 61 (2.8%)                     | 3 (6.3%)                 |          |
| Asthma or COPD                              |                               |                          | 0.141    |
| Absent                                      | 2169 (98.7%)                  | 46 (95.8%)               |          |
| Present                                     | 29 (1.3%)                     | 2 (4.2%)                 |          |
| History of pulmonary tuberculosis           |                               |                          | 1.000    |
| Absent                                      | 2156 (98.1%)                  | 48 (100%)                |          |
| Present                                     | 42 (1.9%)                     | 0                        |          |
| History of stroke                           |                               |                          | 0.490    |
| Absent                                      | 2168 (98.6%)                  | 47 (97.9%)               |          |
| Present                                     | 30 (1.4%)                     | 1 (2.1%)                 |          |
| Coronary artery disease                     |                               |                          | 0.126    |
| Absent                                      | 2171 (98.8%)                  | 46 (95.8%)               |          |
| Present                                     | 27 (1.2%)                     | 2 (4.2%)                 |          |
| Chronic kidney disease                      |                               |                          | 0.022    |
| Absent                                      | 2189 (99.6%)                  | 46 (95.8%)               |          |
| Present                                     | 9 (0.4%)                      | 2 (4.2%)                 |          |
| Parkinson's disease                         |                               |                          | 1.000    |
| Absent                                      | 2189 (99.6%)                  | 48 (100%)                |          |
| Present                                     | 9 (0.4%)                      | 0                        |          |
| Liver cirrhosis                             |                               |                          | 1.000    |
| Absent                                      | 2192 (99.7%)                  | 48 (100%)                |          |
| Present                                     | 6 (0.3%)                      | 0                        |          |
| Atrial fibrillation                         |                               |                          | 1.000    |
| Absent                                      | 2190 (99.6%)                  | 48 (100%)                |          |
| Present                                     | 8 (0.4%)                      | 0                        |          |
| Heart failure                               |                               |                          | 1.000    |
| Absent                                      | 2193 (99.8%)                  | 48 (100%)                |          |
| Present                                     | 5 (0.2%)                      | 0                        |          |
| COPD, chronic obstructive pulmonary disease |                               |                          |          |

Supplementary Table S2-1. Comparison between asymptomatic and symptomatic VTE

|                           | Asymptomatic VTE (n=25) | Symptomatic VTE (n=23) | <i>p</i> |
|---------------------------|-------------------------|------------------------|----------|
| Age, years                |                         |                        | 0.677    |
| ≤44                       | 1 (4.0%)                | 2 (8.7%)               |          |
| 45–59                     | 10 (40.0%)              | 7 (30.4%)              |          |
| ≥60                       | 14 (56.0%)              | 14 (60.9%)             |          |
| Male sex                  | 0                       | 2 (8.7%)               | 0.001*   |
| Comorbidity               |                         |                        | 0.616    |
| Absent                    | 20 (80.0%)              | 17 (73.9%)             |          |
| Present                   | 5 (20.0%)               | 6 (26.1%)              |          |
| Operation                 |                         |                        | 0.293    |
| BCS                       | 8 (34.8%)               | 8 (34.8%)              |          |
| TM without reconstruction | 17 (68.0%)              | 13 (56.5%)             |          |
| TM with reconstruction    | 0                       | 2 (8.7%)               |          |
| Bilaterality              | 2 (8.0%)                | 1 (4.3%)               | 1.000*   |
| Stage                     |                         |                        | 0.788    |
| I                         | 6 (24.0%)               | 5 (21.7%)              |          |
| II                        | 11 (44.0%)              | 12 (52.2%)             |          |
| III                       | 5 (20.0%)               | 5 (21.7%)              |          |
| IV                        | 5 (20.0%)               | 5 (21.7%)              |          |
| Hormonal receptor         |                         |                        | 0.222*   |
| Negative                  | 6 (24.0%)               | 10 (43.5%)             |          |
| Positive                  | 19 (76.0%)              | 13 (56.5%)             |          |
| HER2 status               |                         |                        | 0.332    |
| Negative                  | 14 (56.0%)              | 16 (69.6%)             |          |
| Positive                  | 11 (44.0%)              | 7 (30.4%)              |          |
| Chemotherapy              |                         |                        | 0.407*   |
| Not performed             | 2 (8.0%)                | 4 (17.4%)              |          |
| Performed                 | 23 (92.0%)              | 19 (82.6%)             |          |
| Endocrine treatment       |                         |                        | 0.394    |
| Not done                  | 8 (32.0%)               | 11 (47.8%)             |          |
| Tamoxifen±OFS             | 6 (24.0%)               | 6 (26.1%)              |          |
| Aromatase inhibitor       | 11 (44.0%)              | 6 (26.1%)              |          |

VTE, venous thromboembolism; BCS, breast conserving surgery; TM, total mastectomy; HER2, human epidermal growth factor receptor 2; OFS, ovarian function suppression

\*Fisher's exact test

Supplementary Table S2-2. Factors associated with symptomatic VTE occurrence

|                                | Incidence | HR (95% CI)            | <i>p</i> |
|--------------------------------|-----------|------------------------|----------|
| Age group                      |           |                        |          |
| ≤44                            | 0.4%      | 1                      |          |
| 45–59                          | 0.6%      | 1.493 (0.310–7.185)    | 0.617    |
| ≥60                            | 2.5%      | 6.737 (1.530–29.658)   | 0.012    |
| Sex                            |           |                        |          |
| Female                         | 0.9%      | 1                      |          |
| Male                           | 33.3%     | 40.506 (9.488–172.918) | <0.001   |
| Operation                      |           |                        |          |
| BCS                            | 0.8%      | 1                      |          |
| Simple mastectomy              | 1.4%      | 1.866 (0.773–4.501)    | 0.165    |
| Mastectomy with reconstruction | 14.3%     | 23.570 (5.286–105.108) | <0.001   |
| Stage                          |           |                        |          |
| 0                              | 0         | 0                      | 0.975    |
| I                              | 0.6%      | 1                      |          |
| II                             | 1.6%      | 2.770 (0.976–7.863)    | 0.056    |
| III                            | 2.2%      | 3.856 (1.116–13.322)   | 0.033    |
| IV                             | 2.1%      | 3.771 (0.440–32.294)   | 0.226    |
| Hormonal receptor              |           |                        |          |
| Negative                       | 1.9%      | 1                      |          |
| Positive                       | 0.8%      | 0.407 (0.179–0.929)    | 0.033    |
| HER2 status                    |           |                        |          |
| Negative                       | 1.0%      | 1                      |          |
| Positive                       | 1.2%      | 1.310 (0.539–3.184)    | 0.552    |
| Chemotherapy                   |           |                        |          |
| Not done                       | 0.6%      | 1                      |          |
| Performed                      | 1.2%      | 2.141 (0.728–6.294)    | 0.166    |

HR, hazard ratio; CI, confidence interval; BCS, breast-conserving surgery; HER2, human epidermal growth factor receptor 2

Supplementary Table S2-3. Effect of symptomatic VTE on the recurrence of breast cancer

|                   | Univariable analysis    |          | Multivariable analysis |          |
|-------------------|-------------------------|----------|------------------------|----------|
|                   | HR (95% CI)             | <i>p</i> | HR (95% CI)            | <i>p</i> |
| Age group         |                         |          |                        |          |
| ≤44               | Reference               |          |                        |          |
| 45–59             | 0.827 (0.575–1.191)     | 0.308    |                        |          |
| ≥60               | 0.812 (0.515–1.282)     | 0.372    |                        |          |
| T stage           |                         |          |                        |          |
| T <sub>is</sub>   | Reference               |          | Reference              |          |
| 1                 | 6.016 (1.456–24.860)    | 0.013    | 4.651 (1.118–19.343)   | 0.035    |
| 2                 | 22.697 (5.594–92.098)   | <0.001   | 12.139 (2.936–50.196)  | 0.001    |
| 3                 | 35.723 (7.827–163.046)  | <0.001   | 15.454 (3.292–72.540)  | 0.001    |
| 4                 | 67.903 (14.875–309.981) | <0.001   | 20.860 (4.408–98.715)  | <0.001   |
| N stage           |                         |          |                        |          |
| 0                 | Reference               |          | Reference              |          |
| 1                 | 2.393 (1.616–3.543)     | <0.001   | 1.756 (1.170–2.634)    | 0.007    |
| 2                 | 4.423 (2.766–7.075)     | <0.001   | 2.476 (1.516–4.045)    | <0.001   |
| 3                 | 15.062 (9.831–23.074)   | <0.001   | 8.817 (5.558–13.987)   | <0.001   |
| Hormonal receptor |                         |          |                        |          |
| Negative          | Reference               |          | Reference              |          |
| Positive          | 0.380 (0.278–0.519)     | <0.001   | 0.383 (0.275–0.533)    | <0.001   |
| HER2 status       |                         |          |                        |          |
| Negative          | Reference               |          | Reference              |          |
| Positive          | 1.229 (0.875–1.727)     | 0.234    | 0.658 (0.459–0.944)    | 0.023    |
| Symptomatic VTE   |                         |          |                        |          |
| Absent            | Reference               |          | Reference              |          |
| Present           | 6.935 (3.405–14.128)    | <0.001   | 3.120 (1.502–6.482)    | <0.001   |

HR, hazard ratio; HER2, human epidermal growth factor receptor 2

Supplementary Table S2-4. Effect of symptomatic VTE on the mortality of the patients

|                   | Univariable analysis   |          | Multivariable analysis |          |
|-------------------|------------------------|----------|------------------------|----------|
|                   | HR (95% CI)            | <i>p</i> | HR (95% CI)            | <i>p</i> |
| Age group         |                        |          |                        |          |
| ≤44               | Reference              |          |                        |          |
| 45–59             | 1.213 (0.642–2.293)    | 0.552    |                        |          |
| ≥60               | 2.058 (1.041–4.071)    | 0.038    |                        |          |
| T stage           |                        |          |                        |          |
| T <sub>is</sub>   | Reference              |          |                        |          |
| 1                 | 1.637 (0.482–5.565)    | 0.430    |                        |          |
| 2                 | 4.919 (1.510–16.029)   | 0.008    |                        |          |
| 3                 | 11.336 (2.835–45.339)  | 0.001    |                        |          |
| 4                 | 28.803 (7.796–106.418) | <0.001   |                        |          |
| N stage           |                        |          |                        |          |
| 0                 | Reference              |          | Reference              |          |
| 1                 | 0.890 (0.364–2.179)    | <0.799   | 0.935 (0.382–2.293)    | 0.884    |
| 2                 | 5.787 (2.945–11.374)   | <0.001   | 4.2232 (2.114–8.435)   | <0.001   |
| 3                 | 24.380 (14.098–42.161) | <0.001   | 13.822 (7.436–25.692)  | <0.001   |
| M stage           |                        |          |                        |          |
| 0                 | Reference              |          | Reference              |          |
| 1                 | 19.667 (11.159–34.661) | <0.001   | 4.923 (2.581–9.393)    | <0.001   |
| Hormonal receptor |                        |          |                        |          |
| Negative          | Reference              |          | Reference              |          |
| Positive          | 0.293 (0.184–0.466)    | <0.001   | 0.290 (0.179–0.468)    | <0.001   |
| HER2              |                        |          |                        |          |
| Negative          | Reference              |          |                        |          |
| Positive          | 1.780 (1.102–2.874)    | 0.018    |                        |          |
| Symptomatic VTE   |                        |          |                        |          |
| Absent            | Reference              |          | Reference              |          |
| Present           | 11.327 (4.904–26.163)  | <0.001   | 4.583 (1.946–10.791)   | <0.001   |

HR, hazard ratio; HER2, human epidermal growth factor receptor 2
